# Supplementary material for: Multisequential reversible phase transition materials with semiconducting and fluorescence properties: (C8H18BrN)2SnBr6
Source: Royal Society of Chemistry journal article supplement (doi:10.1039/d1nj04448f), 2021-01-01
Supplement: d1nj04448f1.pdf [file d1nj04448f1.pdf]

## Multisequential reversible phase transition materials with Semiconducting and fluorescence properties : $(C_8H_{18}BrN)_2SnBr_6$

Yao Liu, Yu-Kong Li, Ting-Ting Ying, Ding-Chong Han, Yu-Hui Tan,\* Yun-Zhi Tang,\* Peng-kang Du,  
Hao Zhang

(Faculty of Materials Metallurgy and Chemistry, Jiangxi University of Science and Technology,  
Ganzhou, 341000, Jiangxi Province, P. R. China)

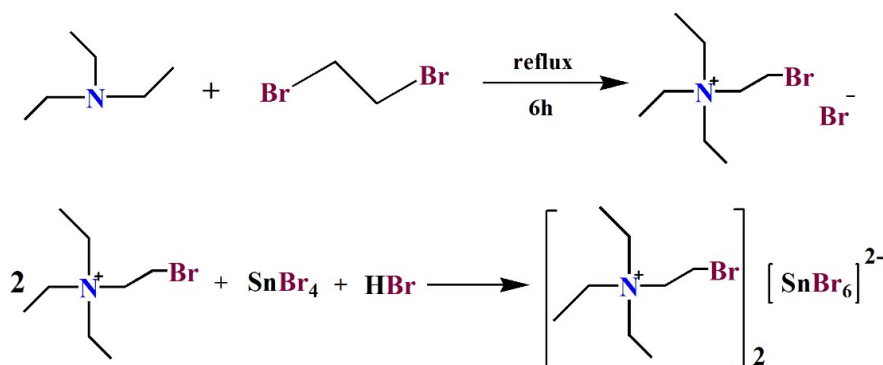

Scheme 1. Schematic diagrams of synthesis of compound 1

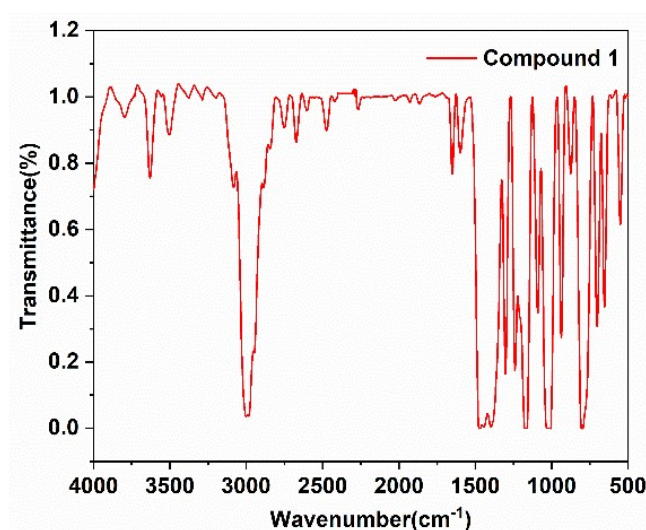

Fig. S1 Infrared spectrum of compound 1

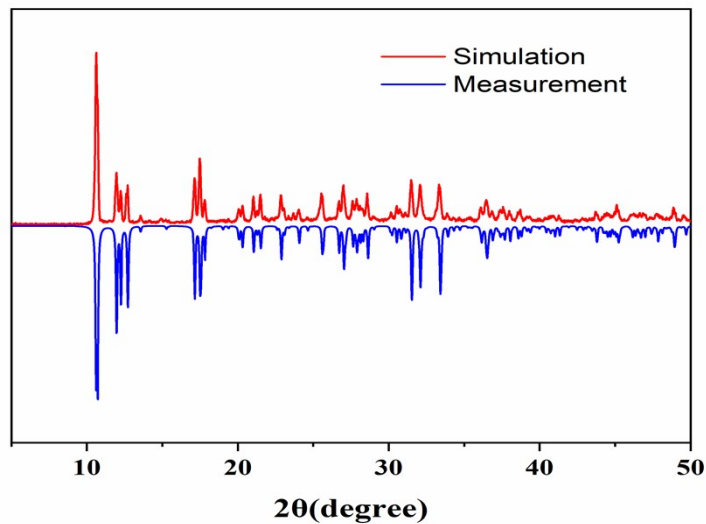

Fig. S2 The powder XRD of 1.

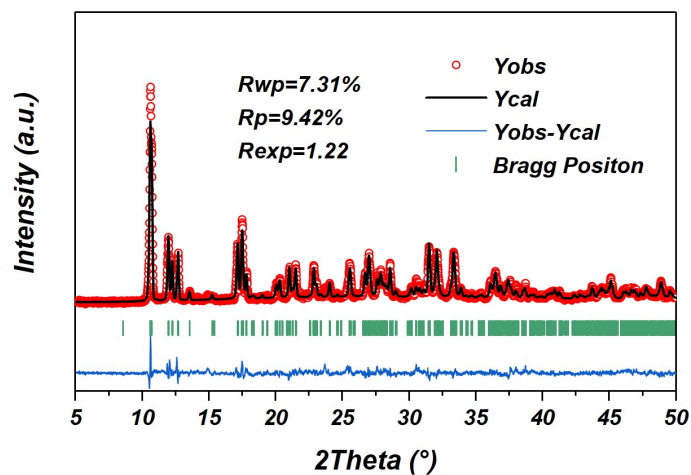

Fig. S3 Powder X-ray diffractograms of 1 collected in 300 K (LTP), refined by Le Bail method using the FULLPROF program. The lattice parameters obtained from the fitting:  $a=14.4563(9)$ ,  $b=14.7985(3)$ ,  $c=13.9563(5)$  Å ( $R_p=7.31\%$ ,  $R_{wp}=9.42\%$ ,  $R_{exp}=1.22\%$ ).

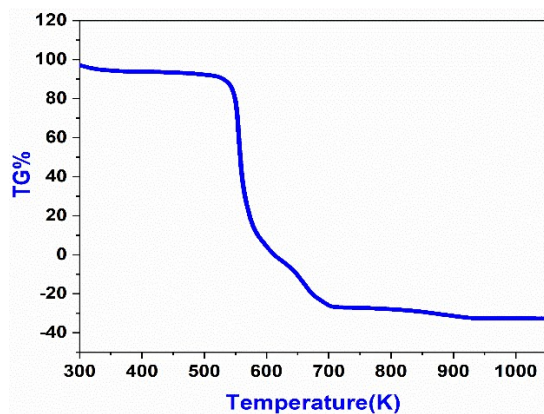

Fig. S4 TG-DTA curves for 1.

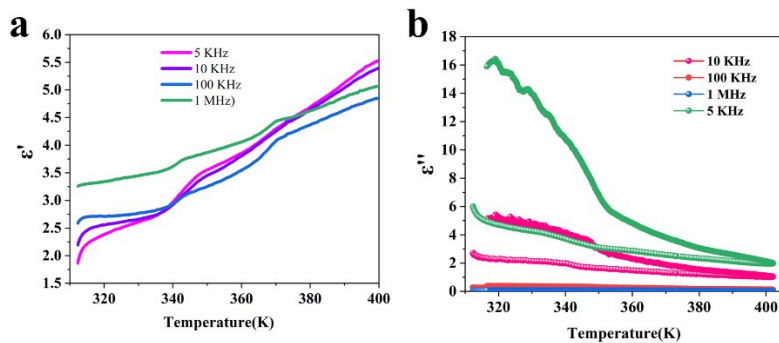

**Fig. S5** (a) The frequency dependence of the dielectric of compound **1** during heating. (b) Temperature-dependent imaginary part ( $\epsilon''$ ) of the permittivity of **1** measured at selected frequencies in heating and cooling modes

**Table.S1** Crystal data and refinement parameters for **1**

| Compound                     | <b>1</b>                      |
|------------------------------|-------------------------------|
| Empirical formula formula    | $C_{16}H_{36}Br_8N_2Sn$       |
| Temperature (K)              | 300 K                         |
| Crystal system               | monoclinic                    |
| Space group                  | $C2/c$                        |
| $a$ (Å)                      | 14.4401(14)                   |
| $b$ (Å)                      | 14.7764(13)                   |
| $c$ (Å)                      | 13.9147(12)                   |
| $\alpha/^\circ$              | 90                            |
| $\beta/^\circ$               | 90.855(3)                     |
| $\gamma/^\circ$              | 90                            |
| $V$ (Å <sup>3</sup> )        | 2968.7(5)                     |
| $Z$                          | 4                             |
| $\rho$ calcg/cm <sup>3</sup> | 2.270                         |
| $\mu$ /mm <sup>-1</sup>      | 11.636                        |
| F(000)                       | 1904.0                        |
| $R_1, wR_2[I > 2\sigma(I)]$  | $R_1 = 0.0655, wR_2 = 0.1322$ |
| $R_1, wR_2(\text{all data})$ | $R_1 = 0.1151, wR_2 = 0.1596$ |

### Calculation of $\Delta S$ and $N$

The first stage :

In the heating cycle mode

$$\Delta S_H = R \ln N$$

$$\Delta S_H = \int_{T_2}^{T_1} \frac{Q}{T} dT$$

$$\approx \frac{\Delta H}{T_c}$$

$$= \frac{4.300 \text{ J}^{-1} \text{ mol} \times 1014.44 \text{ g}^{-1} \text{ mol}}{353 \text{ K}}$$

$$= 12.36 \text{ J} \cdot \text{mol}^{-1} \cdot \text{K}^{-1}$$

$$N_I = \exp\left(\frac{\Delta S_I}{R}\right) = \exp\left(\frac{12.36 \text{ J} \cdot \text{mol}^{-1} \cdot \text{K}^{-1}}{8.314 \text{ J} \cdot \text{mol}^{-1} \cdot \text{K}^{-1}}\right)$$

$$= 4.410$$

**In the cooling cycle mode**

$$\Delta S_C = R \ln N$$

$$\Delta S_C = \int_{T_2}^{T_1} \frac{Q}{T} dT$$

$$\approx \frac{\Delta H}{T_c}$$

$$= \frac{4.104 \text{ J}^{-1} \text{ mol} \times 1014.44 \text{ g}^{-1} \text{ mol}}{345 \text{ K}}$$

$$= 12.07 \text{ J} \cdot \text{mol}^{-1} \cdot \text{K}^{-1}$$

$$N_2 = \exp\left(\frac{\Delta S_C}{R}\right) = \exp\left(\frac{12.07 \text{ J} \cdot \text{mol}^{-1} \cdot \text{K}^{-1}}{8.314 \text{ J} \cdot \text{mol}^{-1} \cdot \text{K}^{-1}}\right)$$

$$= 4.263$$

$$\Delta S_H = R \ln N_I$$

$$\Delta S_H = \int_{T_2}^{T_1} \frac{Q}{T} dT$$

$$\approx \frac{\Delta H}{T_c}$$

$$= \frac{4.300 \text{ J}^{-1} \text{ mol} \times 1014.44 \text{ g}^{-1} \text{ mol}}{353 \text{ K}}$$

$$= 12.36 \text{ J} \cdot \text{mol}^{-1} \cdot \text{K}^{-1}$$

$$N_I = \exp\left(\frac{\Delta S_H}{R}\right) = \exp\left(\frac{12.36 \text{ J} \cdot \text{mol}^{-1} \cdot \text{K}^{-1}}{8.314 \text{ J} \cdot \text{mol}^{-1} \cdot \text{K}^{-1}}\right)$$

$$=4.410$$

**In the heating cycle mode**

$$\Delta S_H = R \ln N_1$$

$$\Delta S_H = \int_{T_2}^{T_1} \frac{Q}{T} dT$$

$$\approx \frac{\Delta H}{T_c}$$

$$= \frac{0.854 \text{ J}^{-1} \text{ mol} \times 1014.44 \text{ g}^{-1} \text{ mol}}{384 \text{ K}}$$

$$= 2.25 \text{ J} \cdot \text{mol}^{-1} \cdot \text{K}^{-1}$$

$$N_1 = \exp\left(\frac{\Delta S_H}{R}\right) = \exp\left(\frac{2.25 \text{ J} \cdot \text{mol}^{-1} \cdot \text{K}^{-1}}{8.314 \text{ J} \cdot \text{mol}^{-1} \cdot \text{K}^{-1}}\right)$$

$$= 1.310$$

**In the cooling cycle mode**

$$\Delta S_C = R \ln N_2$$

$$\Delta S_C = \int_{T_2}^{T_1} \frac{Q}{T} dT$$

$$\approx \frac{\Delta H}{T_c}$$

$$= \frac{0.975 \text{ J}^{-1} \text{ mol} \times 1014.44 \text{ g}^{-1} \text{ mol}}{374 \text{ K}}$$

$$= 2.645 \text{ J} \cdot \text{mol}^{-1} \cdot \text{K}^{-1}$$

$$N_2 = \exp\left(\frac{\Delta S_C}{R}\right) = \exp\left(\frac{2.645 \text{ J} \cdot \text{mol}^{-1} \cdot \text{K}^{-1}}{8.314 \text{ J} \cdot \text{mol}^{-1} \cdot \text{K}^{-1}}\right)$$

$$= 1.374$$
